# Supplementary material
Source: PubMed Central journal article supplement (PMC6867279)
Supplement: HBM-37-3103-s001.pdf [file HBM-37-3103-s001.pdf]

## Supplemental Materials of

### Multimodal analysis of cortical chemoarchitecture and macroscale fMRI resting-state functional connectivity

#### Authors

Martijn P. van den Heuvel<sup>1</sup>, Lianne H. Scholtens<sup>1</sup>, Elise Turk<sup>1</sup>, Dante Mantini<sup>4,5,6</sup>, Wim Vanduffel<sup>4,7</sup>, Lisa Feldman Barrett<sup>2,3</sup>

**Supplemental Table 1.** Table describes the mapping of the original document regions to the regions of the Desikan-Kiliany atlas used for the functional connectivity

| <b>Amunts regions</b> | <b>Regions in DK-57</b>                  |
|-----------------------|------------------------------------------|
| 4                     | precentral gyrus 1,2,3                   |
| 6                     | superiorfrontal 3, caudalmiddlefrontal 1 |
| 6r1                   | precentral gyrus 4                       |
| 44                    | parsopercularis 1                        |
| 45                    | parstriangularis 1                       |
| 47                    | lateralorbitofrontal 1                   |
| op8                   | parsopercularis 1                        |
| op9                   | parsorbitalis 1                          |

**Supplemental Table 2.** Table describes the mapping of the original document regions to the regions of the Desikan-Kiliany atlas used for the functional connectivity

| <b>Zilles regions</b> | <b>Regions in DK-57</b> |
|-----------------------|-------------------------|
| IFS1/IFJ              | rostralmiddlefrontal 1  |
| pSTG/STS              | superiortemporal 1      |
| 44v                   | parsopercularis 1       |
| 44d                   | rostralmiddlefrontal 1  |
| 45a                   | parsopercularis 1       |
| 45p                   | parsopercularis 1       |
| 47                    | parsorbitalis 1         |
| Te2                   | transversetemporal 1    |

|      |                            |
|------|----------------------------|
| 4v   | precentral 3               |
| 4d   | precentral 2               |
| 3b   | postcentral 2              |
| Te1  | transversetemporal 1       |
| V1   | lateraloccipital 1         |
| FG1  | fusiform 1                 |
| FG2  | fusiform 2                 |
| 9    | superiorfrontal 1          |
| 46   | rostralmiddlefrontal 3     |
| 32   | rostralanteriorcingulate 1 |
| 7    | superiorparietal 1         |
| PF   | supramarginal 2            |
| PFcm | supramarginal 2            |
| PFm  | supramarginal 2            |
| Pfop | supramarginal 1            |
| PFt  | supramarginal 1            |
| Pga  | inferiorparietal 2         |
| PGp  | inferiorparietal 2         |

**Supplemental Table 3.** Table describes the mapping of the original document regions to the regions of the Walker-Bonin&Bailey atlas used for the macaque functional connectivity

| <b>Kötter regions</b>                 | <b>Regions in WBB47</b> |
|---------------------------------------|-------------------------|
| F1                                    | FA                      |
| F2v, F2d, F3, F6, F7                  | FB                      |
| F4v, F4d                              | FBA                     |
| F5                                    | FCBm                    |
| VIP                                   | PEm                     |
| PO, MIP, PEP                          | PEp                     |
| LIP, PG, MST                          | PG                      |
| FST                                   | TA                      |
| V3v, V3d, V3A, V4v, V6A, V4t, MT, MTp | OA                      |
| V2v, V2d                              | OB                      |
| V1                                    | OC                      |
